# Supplementary material for: Bottom-up assembly of hierarchical Cu2O nanospheres: controllable synthesis, formation mechanism and enhanced photochemical activities
Source: Royal Society of Chemistry journal article supplement (doi:10.1039/c2ce25071c), 2012-01-01
Supplement: c2ce25071c.pdf [file c2ce25071c.pdf]

## Electronic Supplementary Information

### Bottom-up assembly of hierarchical $\text{Cu}_2\text{O}$ nanospheres: controllable synthesis, formation mechanism and enhanced photochemical activities

Shaodong Sun, Xiaozhe Zhang, Xiaoping Song, Shuhua Liang, Liqun Wang and Zhimao Yang\*

*School of Science, State Key Laboratory for Mechanical Behavior of Materials, MOE Key Laboratory for Non-Equilibrium Synthesis and Modulation of Condensed Matter, Xi'an Jiaotong University, Xi'an 710049, ShaanXi, People's Republic of China*

\* Corresponding author. E-mail: zmyang@mail.xjtu.edu.cn

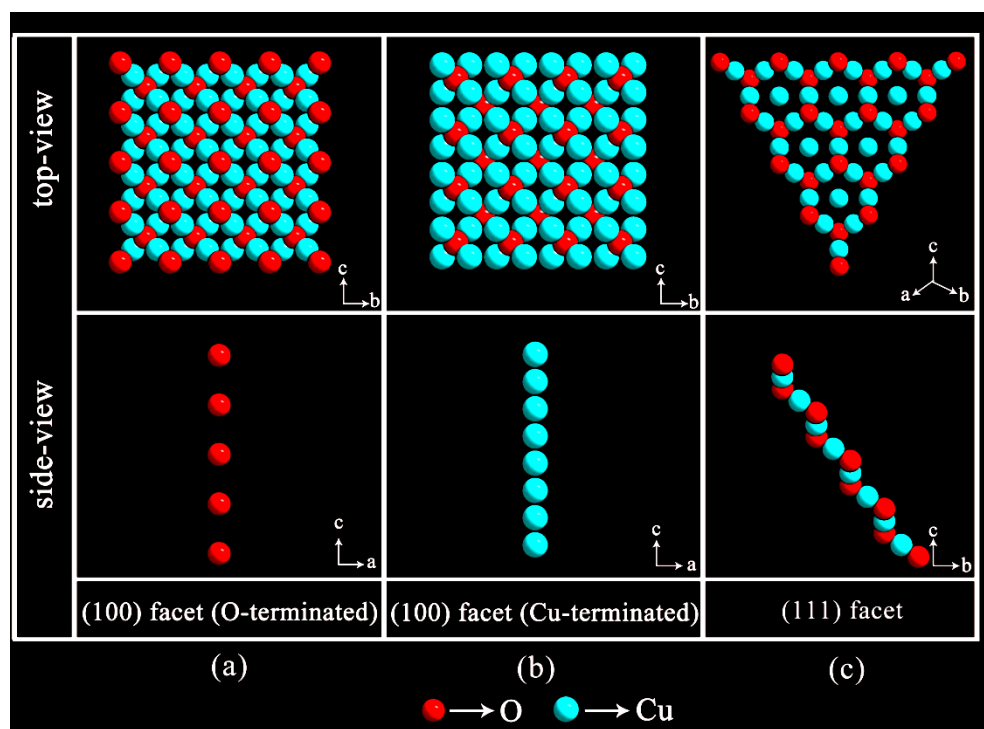

**Fig. S1** The crystallographic structures of  $\{100\}$  (a and b) and  $\{111\}$  (c) facets of  $\text{Cu}_2\text{O}$  crystal.

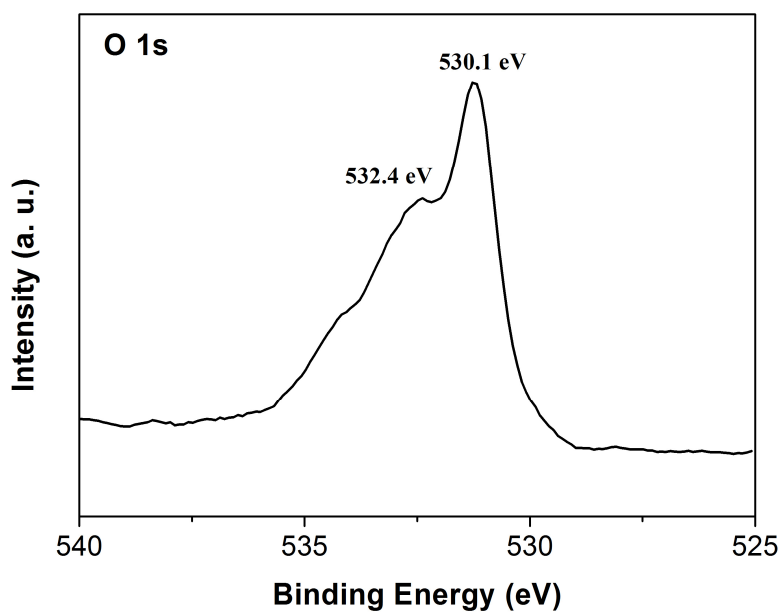

**Fig. S2** The O 1s XPS spectrum of the as-prepared hierarchical Cu<sub>2</sub>O crystals.

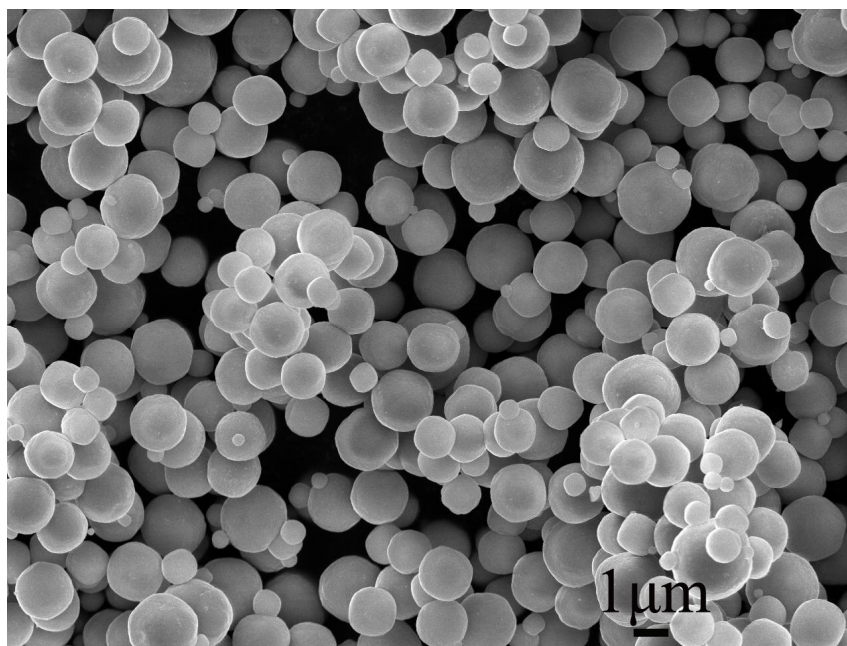

**Fig. S3** FESEM image of the product obtained in the absence of anhydrous ethanol.

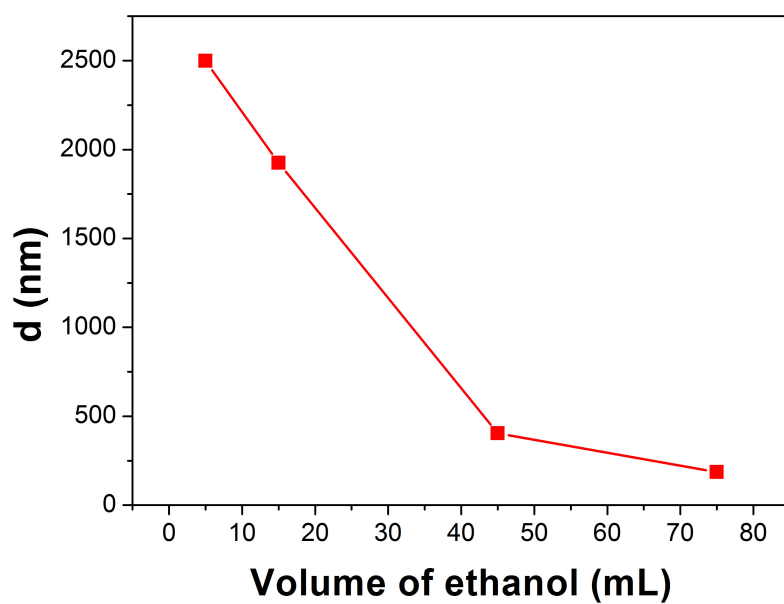

**Fig. S4** A plot of the size transformation of the products obtained at different volume of anhydrous ethanol.

**Table 1**

| Products | Average size (nm) |
|----------|-------------------|
| Fig. 1c  | 185 ± 19          |
| Fig. 4e  | 2497 ± 130        |
| Fig. 4f  | 1925 ± 118        |
| Fig. 4g  | 404 ± 30          |
| Fig. 5c  | 466 ± 32          |
| Fig. 5d  | 150 ± 20          |

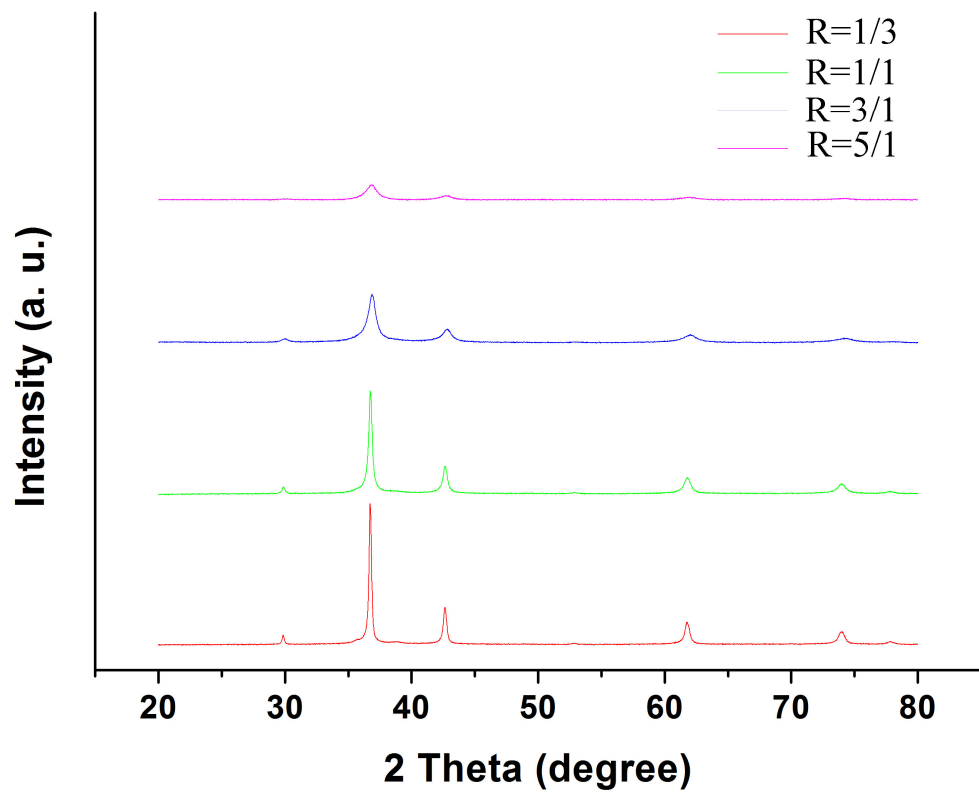

**Fig. S5** XRD patterns of the products obtained in different volume ratio of anhydrous ethanol to ultrapure water ( $R$ ). The inset shows the corresponding  $R$  values.

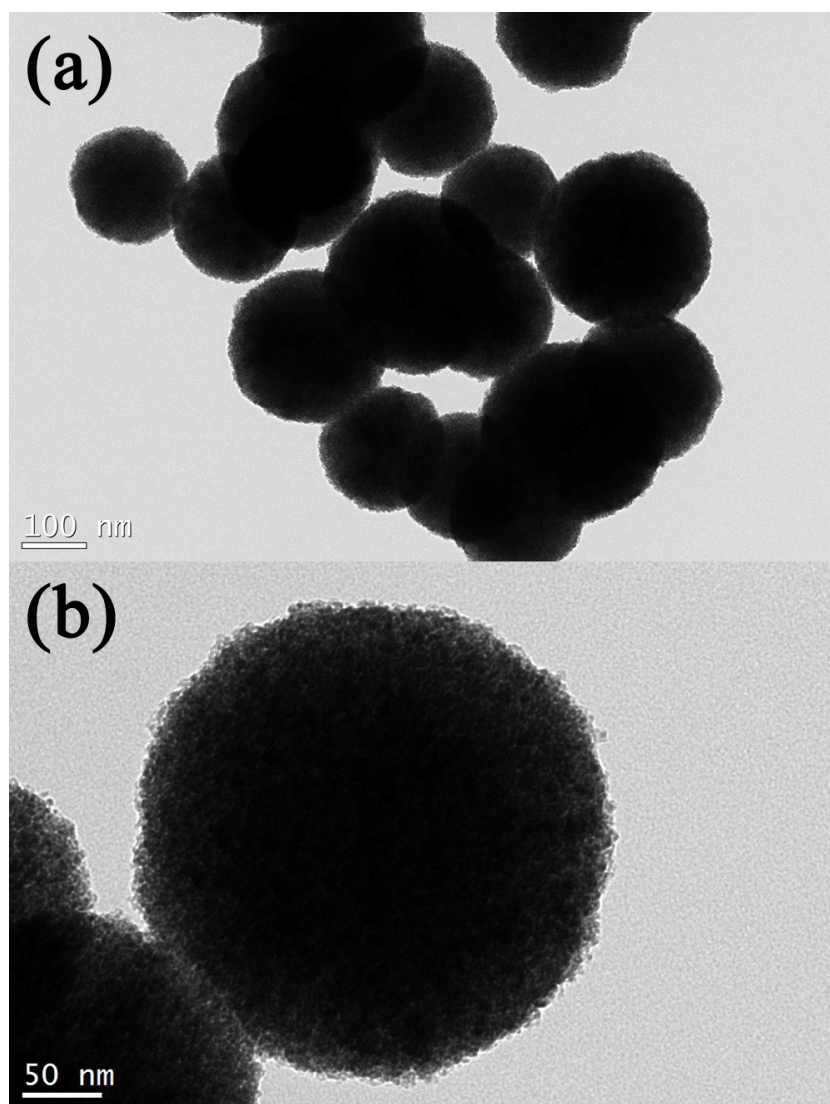

Fig. S6 TEM image of the product obtained in the presence of glycol under otherwise the same reaction conditions.

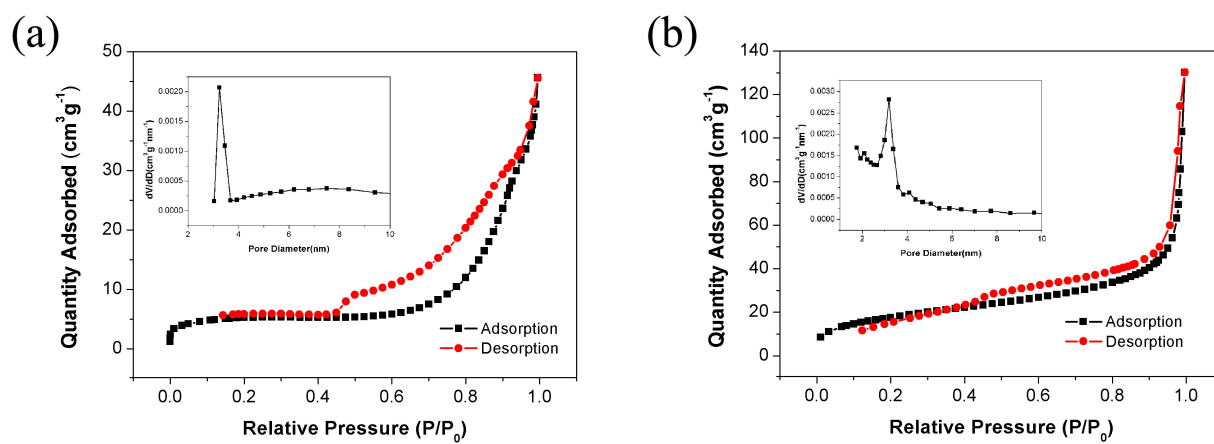

Fig. S7 Typical nitrogen gas adsorption-desorption isotherms and pore size distribution curves (insets) of the hierarchical Cu<sub>2</sub>O nanospheres: (a) sample A; (b) sample B.
